# Supplementary material for: Controlling the C1/C2+ product selectivity of electrochemical CO2 reduction upon tuning bimetallic CuIn electrocatalyst composition and operating conditions
Source: Royal Society of Chemistry journal article supplement (doi:10.1039/d3dt03044j), 2023-01-01
Supplement: d3dt03044j1.pdf [file d3dt03044j1.pdf]

## Supporting information

### **Controlling the C<sub>1</sub>/C<sub>2+</sub> product selectivity of electrochemical CO<sub>2</sub> reduction upon tuning bimetallic CuIn electrocatalyst composition and operating conditions**

Lin Gu<sup>a</sup>, Abhishek Dutta Chowdhury<sup>a,\*</sup>

<sup>a</sup> *College of Chemistry and Molecular Sciences, Wuhan University, Wuhan, Hubei 430072, P. R. China*

\* Corresponding author

**E-mail address:** [abhishek@whu.edu.cn](mailto:abhishek@whu.edu.cn)

## Experimental Section

### Materials and reagents

All chemicals were used as purchased without further purification. Copper (II) nitrate trihydrate  $\text{Cu}(\text{NO}_3)_2 \cdot 3\text{H}_2\text{O}$ , indium (III) nitrate hydrate  $\text{In}(\text{NO}_3)_3 \cdot x\text{H}_2\text{O}$ , and potassium bicarbonate ( $\text{KHCO}_3$ ) were obtained from Innochem (Beijing) Science & Technology Co., Ltd (Beijing, China). Sodium carbonate ( $\text{Na}_2\text{CO}_3$ ) was purchased from Bidepharm Co. Ltd (Shanghai, China). Nafion solution (5 %) was purchased from Dupont China Holding Co. Ltd. Potassium hydroxide (KOH) was purchased from Sinopharm Chemical Reagent Co. Ltd (Shanghai, China). High-purity  $\text{CO}_2$  ( $\geq 99.99\%$ ) and Ar ( $\geq 99.99\%$ ) was supplied by Zxrygas Co. Ltd (Wuhan, China).

### Characterization

X-ray diffraction (XRD) was performed using a Rigaku Smartlab SE system with Cu  $K\alpha$  radiation in the  $2\theta$  range from  $5^\circ$  to  $90^\circ$ . X-ray photoelectron spectroscopy (XPS) was performed using a Thermo ESCALAB 250Xi spectrometer, with a monochromated Al- $K\alpha$  (1486.6 eV). Scanning electron microscopy (SEM) and transmission electron microscopy (TEM) were performed on a scanning microscope (Hitachi S4800 field-emission) operated at 15 kV and a transmission electron microscope (Tecnai G2 F30 S-TWIN), respectively. The TEM samples were prepared by dispersing catalyst powder in alcohol by ultra-sonication, and a droplet of this ink was dropped onto TEM grids with carbon film. The copper and indium content was determined by inductively coupled plasma optical emission spectroscopy (ICP-OES) analysis using the emission spectrometer (Agilent ICPOES730).

The crystallite size of  $\text{InCu}_n\text{O}_x$  was calculated using the Scherrer's equation<sup>1</sup>:

$$D = \frac{K\lambda}{B\cos\theta}$$

Where  $k$  is the configuration component (0.9),  $\lambda$  is the wavelength of X-ray radiation,  $\theta$  is Bragg's intersection of the prominent and  $B$  is angular broadness of peaks at full width at half maximum (FWHM)<sup>1</sup>.

### **Materials synthesis of $\text{InCu}_n\text{O}_x$**

The  $\text{InCu}_n\text{O}_x$ -based materials were prepared by the co-precipitation-calcination method. 3.3/0.7 mmol of  $\text{In}(\text{NO}_3)_3 \cdot x\text{H}_2\text{O}$  and 0.35/0.7/2.5/4.1 mmol of  $\text{Cu}(\text{NO}_3)_2 \cdot 3\text{H}_2\text{O}$  were dissolved in deionized water (14.3 mL). 94 mmol of  $\text{Na}_2\text{CO}_3$  was also dissolved in deionized water (100 mL) to form a transparent solution and added dropwise to the above metallic solution under stirring at room temperature to reach a pH of 9.2. Then, the bimetallic precipitate was recovered by centrifugation and dried in a vacuum oven (60 °C). These materials were then calcined for 3 h at 300 °C (2 °C min<sup>-1</sup>) in the static air, which led to the electrocatalysts of composition  $\text{InCu}_n\text{O}_x$ . Herein, these catalytic materials were named based on the different content of Cu (i.e.,  $n$  as identified by ICP-OES, see Table S1), where  $n = 5, 10, 25,$  and  $73$  were synthesized by using a similar strategy by adjusting the concentration of  $\text{In}(\text{NO}_3)_3 \cdot x\text{H}_2\text{O}$  and  $\text{Cu}(\text{NO}_3)_2 \cdot 3\text{H}_2\text{O}$ .

### **Preparation of electrodes for eCO<sub>2</sub>R in H-type cell and flow cell**

1 mg of  $\text{InCu}_n\text{O}_x$  powder was dispersed into a solution containing 500  $\mu\text{L}$  isopropanol, and 500  $\mu\text{L}$  deionized water, and 40  $\mu\text{L}$  of nafion solution (5%); subsequently, the ink was dropped onto carbon paper (1 cm  $\times$  1 cm). The  $\text{InCu}_n\text{O}_x$  materials were uniformly loaded on carbon paper and acted as the working electrode (1 mg cm<sup>-2</sup>).

## Electrochemical measurements

All electrochemical measurements were assessed using a CHI 760E electrochemical workstation with an H-type cell (Gaossunion, China) and flow cell (Dioxide Materials, America). The H-type cell experiments were carried out in a gas-tight two-compartment H-type cell separated by a Nafion-117 membrane under ambient conditions. Ag/AgCl electrode and Pt sheet electrode were used as the reference and counter electrode, respectively. CO<sub>2</sub>-saturated 0.1 M KHCO<sub>3</sub> was used as the electrolyte for the H-type cell (anode and cathode chambers). Flow cell studies were performed using a gas diffusion electrode (GDE) flow cell, including a Ti current collector with interdigitated gas-diffusion channels, a 3D printed chamber with ports for electrolyte flow and reference electrode, and a Ni foam inserted in a pocket of Ti current collector as the anode. Anion exchange membrane (Fumasep FAA-3-PK-130) and cation exchange membrane (Nafion-117) were used to separate the cathode and anode chambers. A leak-free Ag/AgCl electrode was used as the reference electrode. The above-prepared electrodes were used as working electrodes with an effective area of 1 cm<sup>2</sup>. The catholyte and anolyte were each 30 mL of 1 M KOH/0.1 M KHCO<sub>3</sub> solution circulated using peristaltic pumps (Rongbaipump, China) at a flow rate of 5 mL min<sup>-1</sup>. For both H-type cell and flow cell studies, CO<sub>2</sub> gas flow was controlled by a mass flow controller at a specified flow rate of 20 sccm, and the applied potentials were iR-compensated and converted to the RHE scale. All the potentials in this work were converted to the reversible hydrogen electrode (RHE) according to the formula:

$$E (\text{RHE}) = E (\text{Ag/AgCl}) + 0.197 + 0.059 \times \text{pH}.$$

The reported partial current densities for eCO<sub>2</sub>R were normalized to geometric surface

areas. Electrochemical impedance spectroscopy (EIS) and electrochemical surface area (ECSA) measurements were measured under CO<sub>2</sub>-saturated electrolyte.

### Electrochemical CO<sub>2</sub> reduction experiments

Electrochemical CO<sub>2</sub> reduction (eCO<sub>2</sub>R) was conducted in a CO<sub>2</sub>-saturated electrolyte. The chronoamperometry was performed at the potential range from -0.8 V to -1.2 V vs. RHE for the 0.1 M KHCO<sub>3</sub> and -0.5 V to -1 V vs. RHE for 1 M KOH. The gas-phase products were analyzed by an online gas chromatograph (GC, Ruimin, China). The thermal conductivity detector (TCD) was used for H<sub>2</sub> analysis, and the flame ionization detector (FID) was used for CO (with a methanizer), CH<sub>4</sub>, and C<sub>2</sub>H<sub>4</sub> analysis. The faradaic efficiency for gas- and liquid-

phase products were calculated by using  $FE = \frac{nFCivP}{jRT}$  and  $FE = \frac{nFCiV}{Q}$ , respectively, where  $n$  is the number of electrons transferred for electrochemical reduction of CO<sub>2</sub> to each target product molecule,  $F$  is the Faraday constant (96485 C mol<sup>-1</sup>),  $C_i$  is the concentration of the target product analyzed by GC or NMR (Bruker AVANCE III 600),  $v$  is the inlet gas flow rate (20 sccm),  $j$  is current.  $T$ ,  $P$ , and  $R$  are the temperature, the pressure, and the gas constant, respectively.  $V$  is the volume of the cathode electrolyte, and  $Q$  is the total charge during the eCO<sub>2</sub>R. CO<sub>2</sub> electrolysis was performed under various operating conditions and tested twice independently. The error bars represent standard deviation of two independent measurements conducted under the same conditions. The post-reacted InCu<sub>5</sub>O<sub>x</sub> and InCu<sub>73</sub>O<sub>x</sub> electrocatalysts after eCO<sub>2</sub>R were prepared for the characterization (TEM and XPS) using a flow cell at an applied potential of -0.8 V vs. RHE for 1 h (with AEM) and an H-type cell at an applied potential of -1.2 V vs. RHE for 1 h (with CEM).

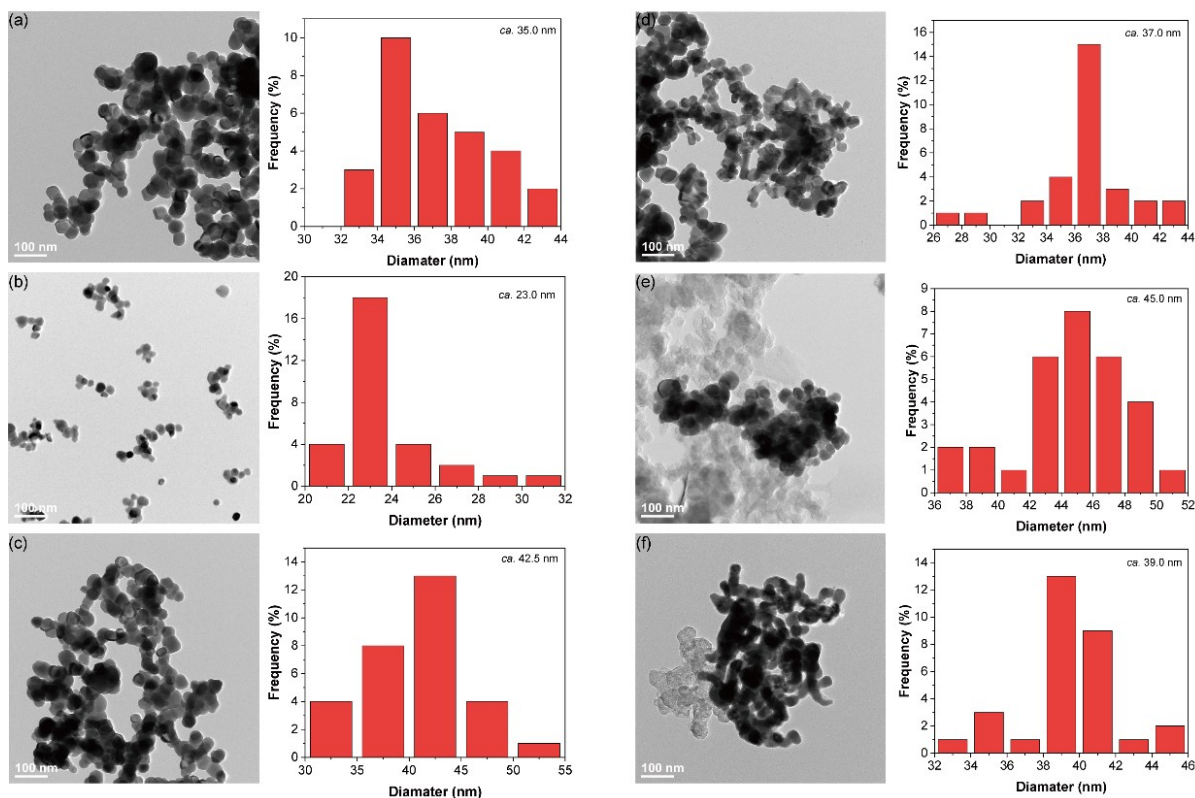

**Fig. S1.** (a) TEM images of as-synthesized  $\text{InCu}_5\text{O}_x$  material with an average diameter of 35.0 nm. (b) TEM images of as-synthesized  $\text{InCu}_{10}\text{O}_x$  material with an average diameter of 23.0 nm. (c) TEM images of as-synthesized  $\text{InCu}_{25}\text{O}_x$  material with an average diameter of 42.5 nm. (d) TEM images of as-synthesized  $\text{InCu}_{73}\text{O}_x$  material with an average diameter of 37.0 nm. (e) TEM images of post-reacted  $\text{InCu}_5\text{O}_x$  material after  $\text{eCO}_2\text{R}$  in a flow cell ( $-0.8\text{ V vs. RHE}$  for 1 h) with an average diameter of 45.0 nm. (f) TEM images of post-reacted  $\text{InCu}_{73}\text{O}_x$  material after  $\text{eCO}_2\text{R}$  in a flow cell ( $-0.8\text{ V vs. RHE}$  for 1 h) with an average diameter of 39.0 nm.

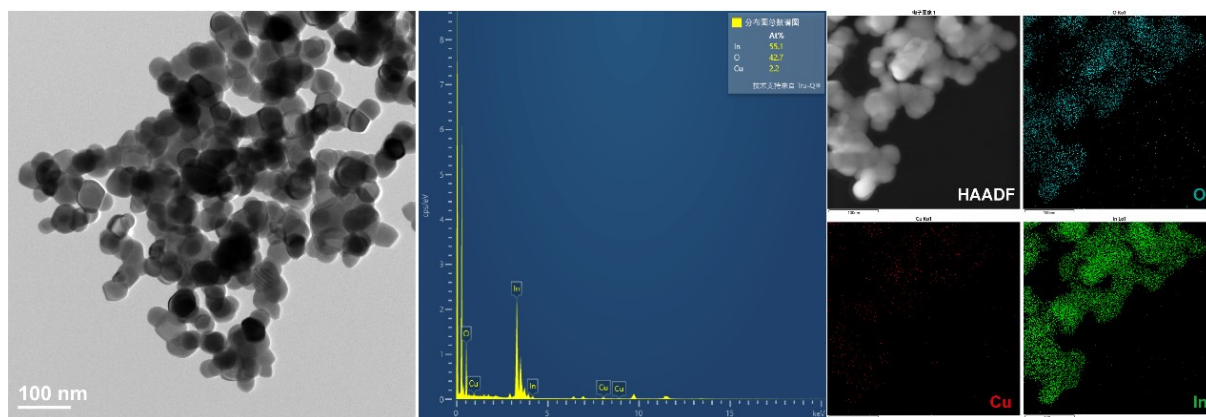

**Fig. S2.** EDX spectrum and elemental mappings show uniform nanoparticle morphology, where the Cu, In, and O elements are evenly distributed over the InCu<sub>5</sub>O<sub>x</sub> material.

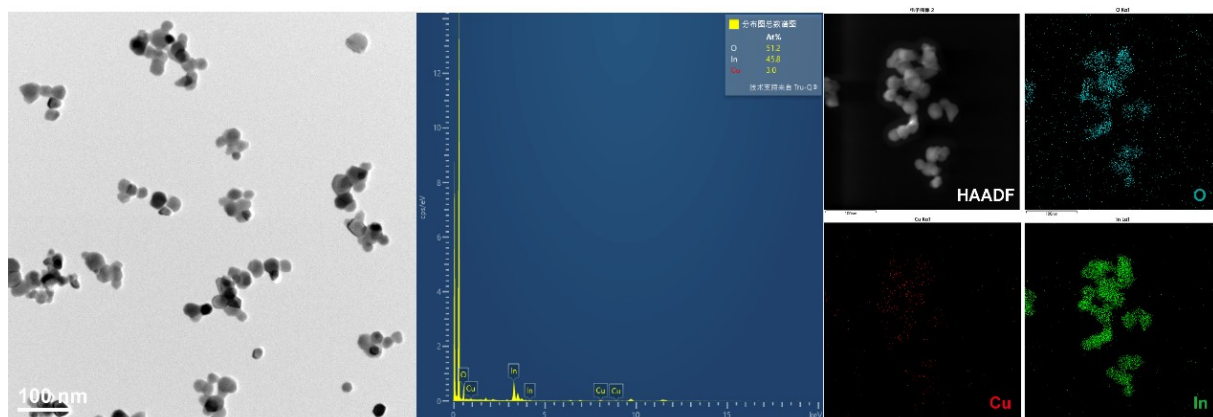

**Fig. S3.** EDX spectrum and elemental mappings show uniform nanoparticle morphology, where the Cu, In, and O elements are evenly distributed over the InCu<sub>10</sub>O<sub>x</sub> material.



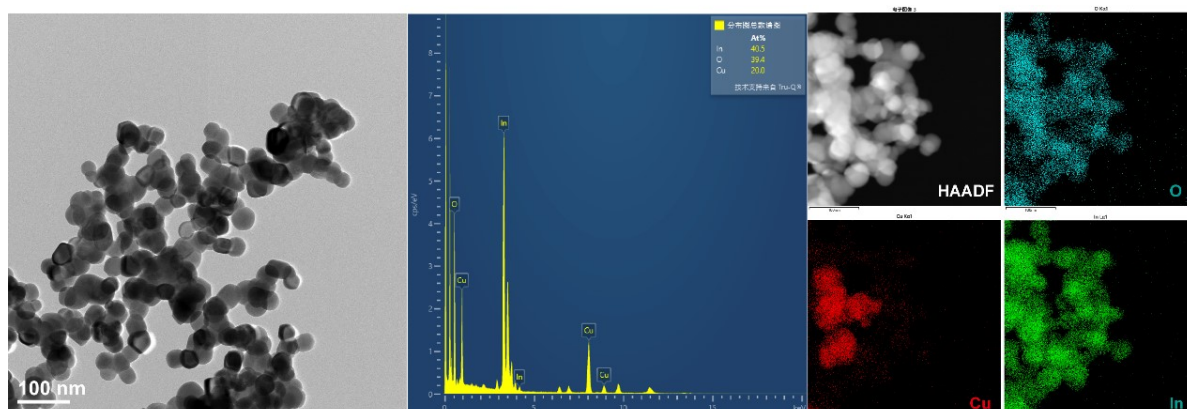

**Fig. S4.** EDX spectrum and elemental mappings show uniform interconnected nanoparticle morphology, where the Cu, In, and O elements are evenly distributed over the  $\text{InCu}_{25}\text{O}_x$  material.

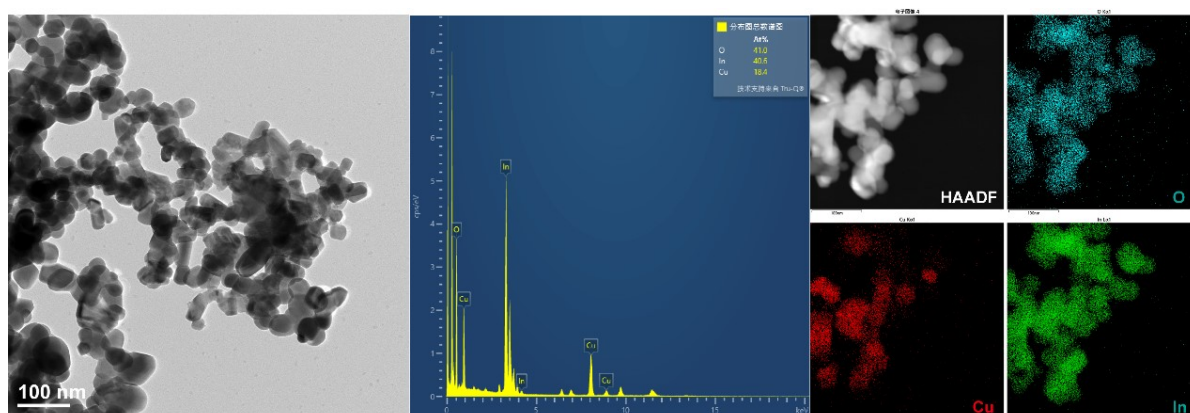

**Fig. S5.** EDX spectrum and elemental mappings show uniform interconnected nanoparticle morphology, where the Cu, In, and O elements are evenly distributed over the  $\text{InCu}_{73}\text{O}_x$  material.

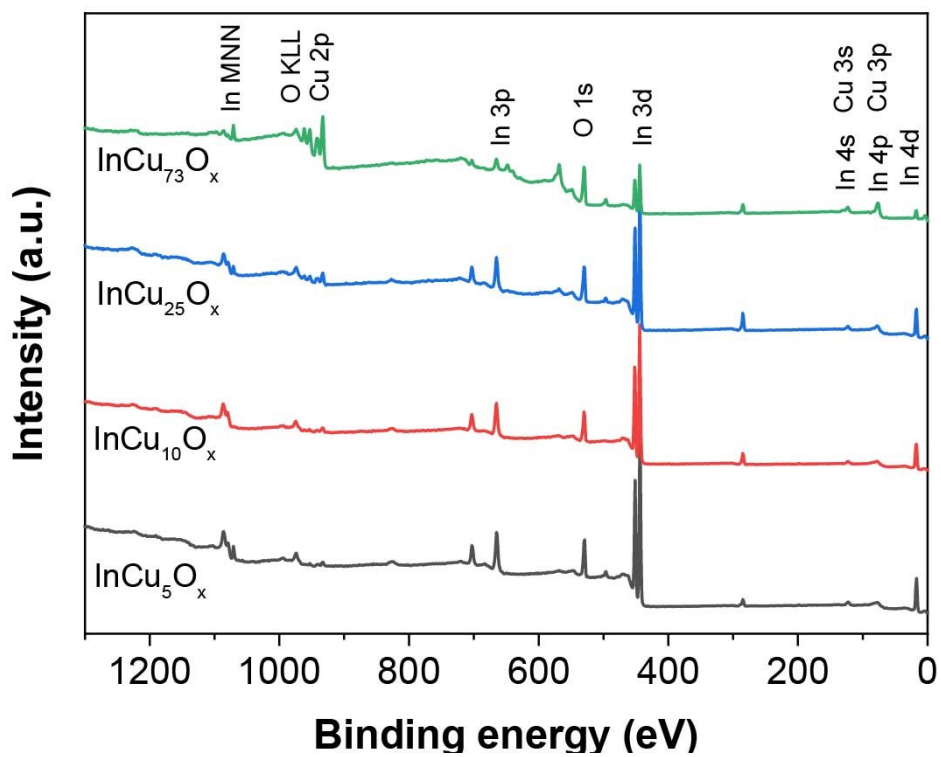

**Fig. S6.** XPS survey scan of InCu<sub>n</sub>O<sub>x</sub> materials comprising Cu 2p, In 3d, O 1s, and Cu LMM spectra.

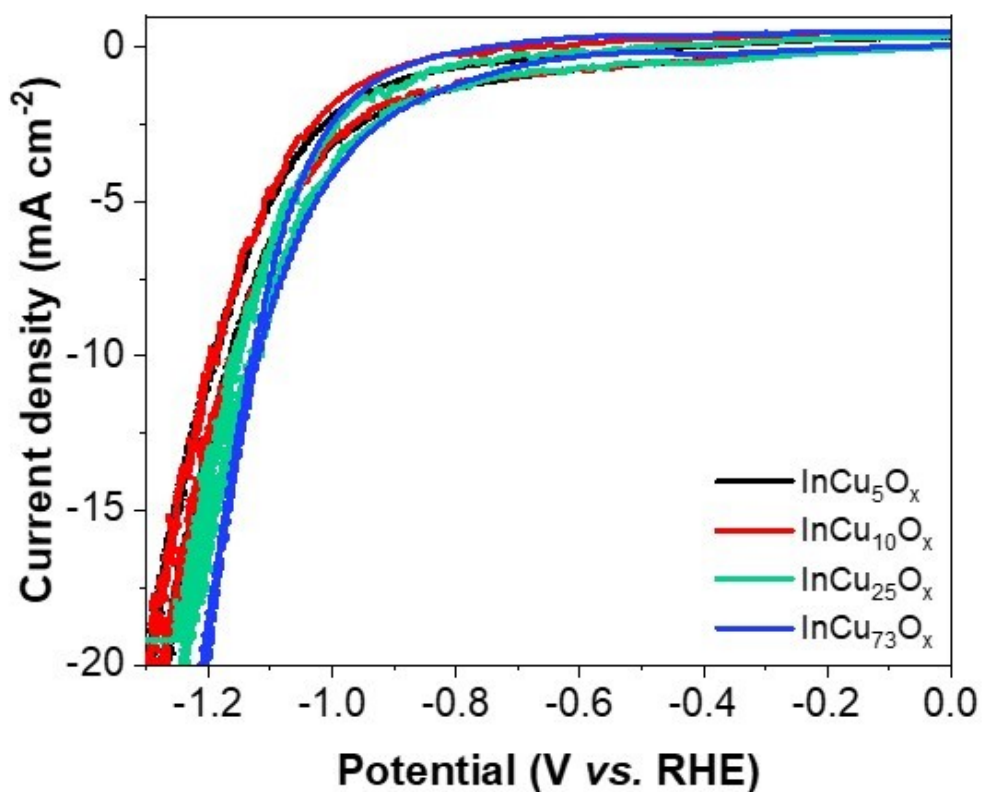

**Fig. S7.** To stabilize the InCu<sub>n</sub>O<sub>x</sub> electrode surface, cyclic voltammetry (CV) measurements were performed before the eCO<sub>2</sub>R reaction. Herein, CV curves for InCu<sub>n</sub>O<sub>x</sub> materials were measured in CO<sub>2</sub>-saturated 0.1 M KHCO<sub>3</sub> electrolyte (pH = 6.8) using an H-type cell (CEM) with a sweeping rate of 10 mV s<sup>-1</sup> from 0 to -1.3 V versus the reversible hydrogen electrode (vs. RHE).

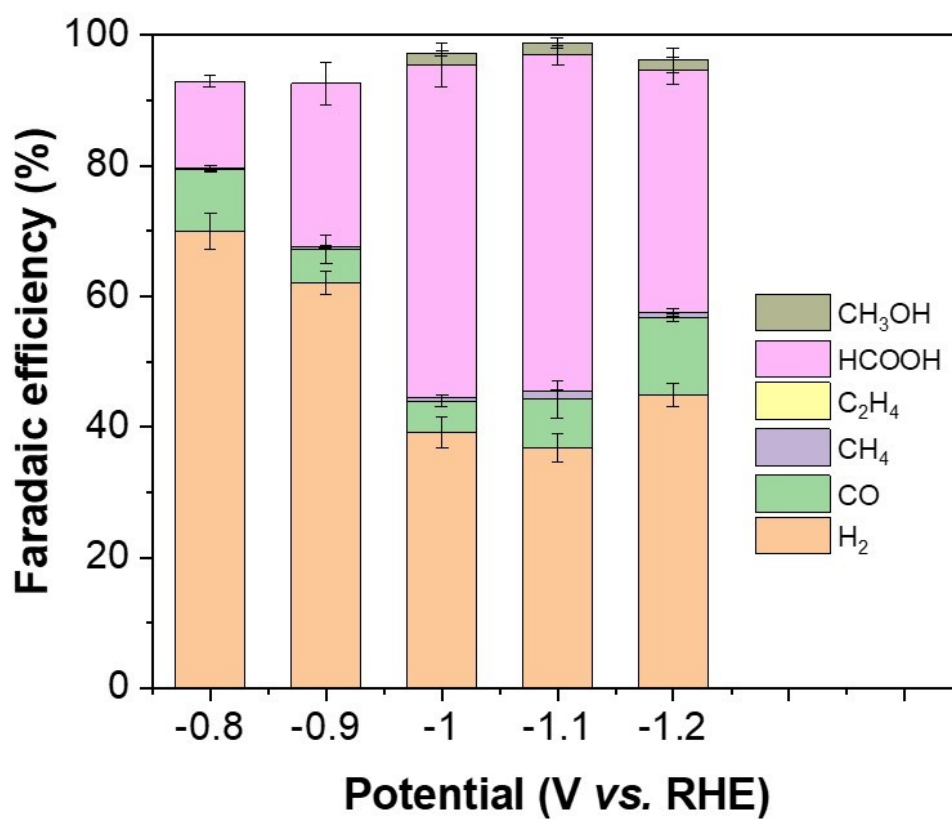

**Fig. S8.** The FE for different eCO<sub>2</sub>R products at selected potentials over InCu<sub>10</sub>O<sub>x</sub> materials in CO<sub>2</sub>-saturated 0.1 M KHCO<sub>3</sub> using H-type cell with CEM. See Fig. 5c for the comparable data over InCu<sub>73</sub>O<sub>x</sub> material.

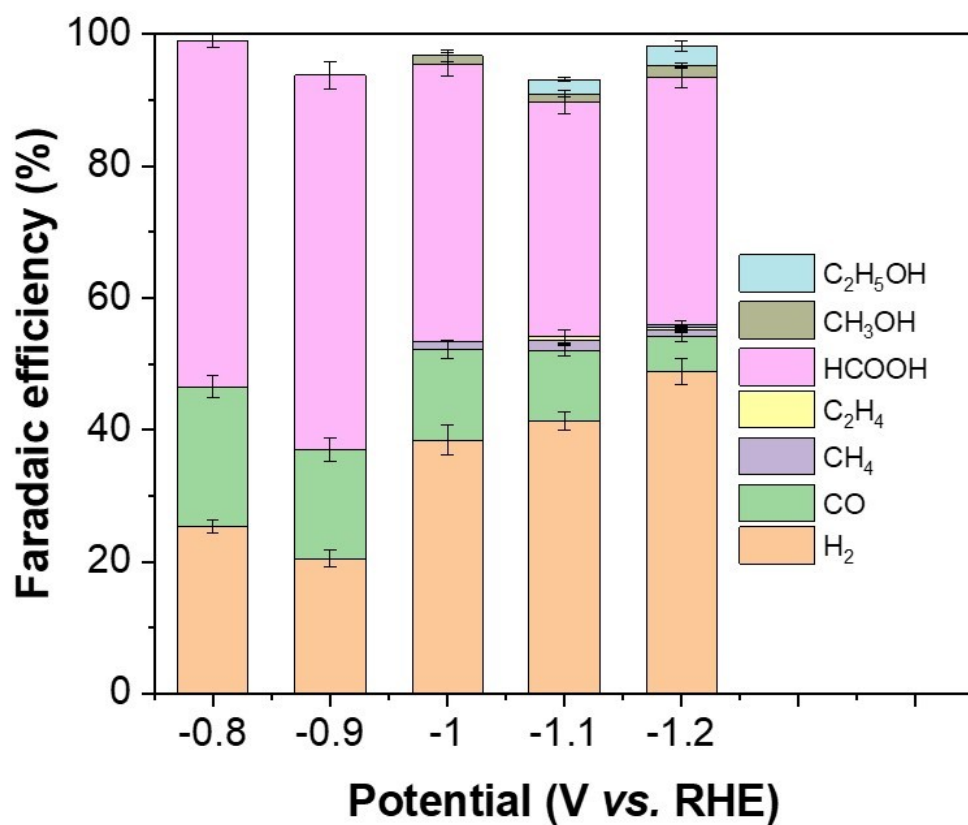

**Fig. S9.** The FE for different eCO<sub>2</sub>R products at selected potentials over InCu<sub>25</sub>O<sub>x</sub> material in CO<sub>2</sub>-saturated 0.1 M KHCO<sub>3</sub> using H-type cell with CEM. See Fig. 5c for the comparable data over InCu<sub>73</sub>O<sub>x</sub> material.

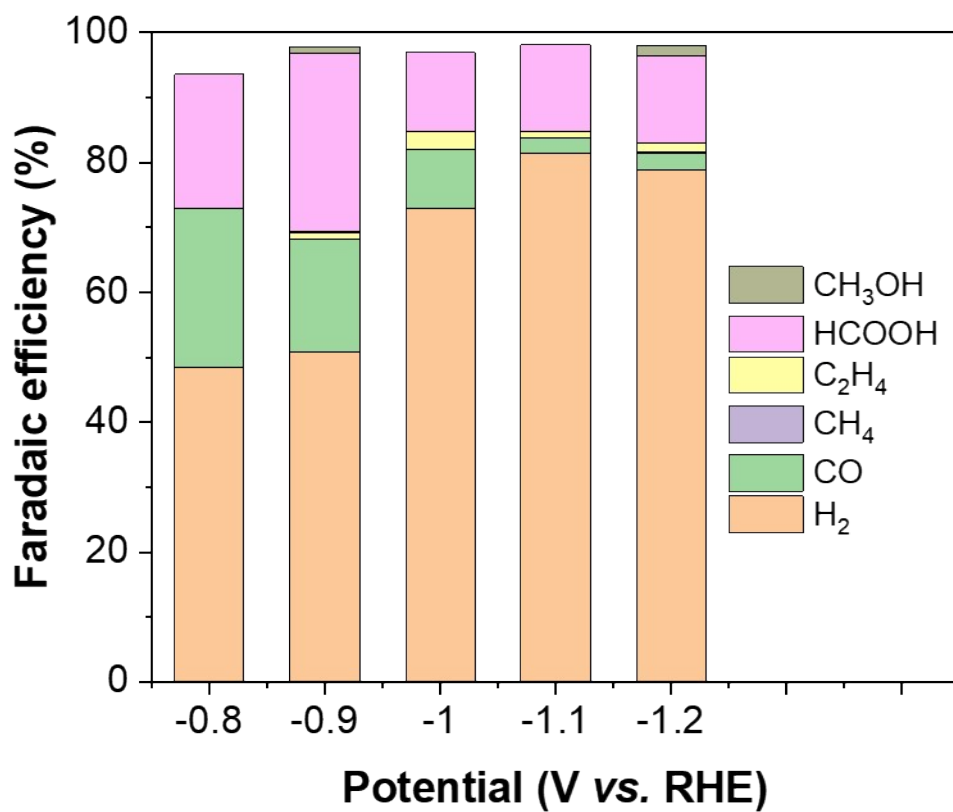

**Fig. S10.** The FE for different eCO<sub>2</sub>R products at selected potentials over InCu<sub>73</sub>O<sub>x</sub> material in CO<sub>2</sub>-saturated 0.5 M KHCO<sub>3</sub> using H-type cell with CEM. See Fig. 5c for the comparable data over InCu<sub>73</sub>O<sub>x</sub> material (0.1 M KHCO<sub>3</sub>).

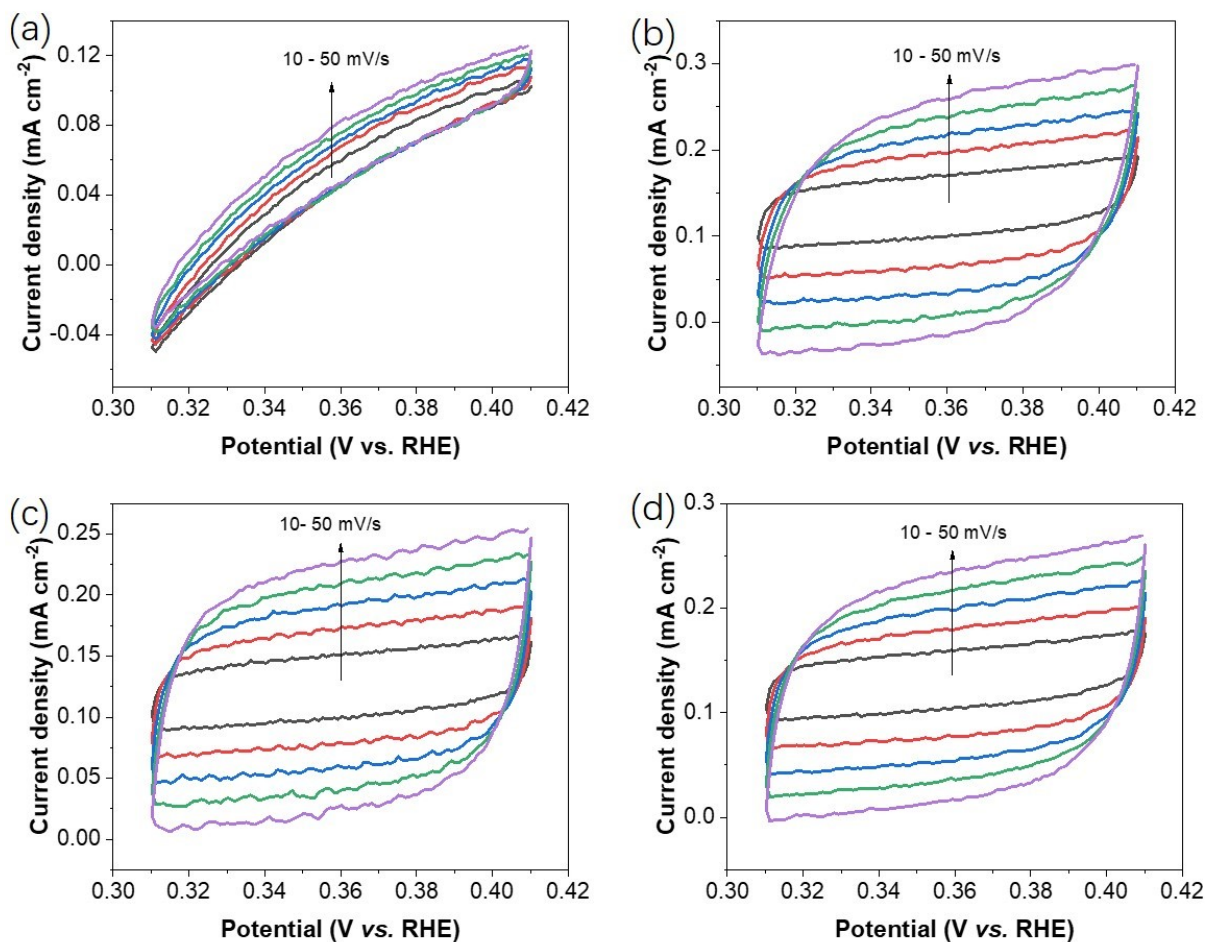

**Fig. S11.** CV was performed at scan rates of  $10 \text{ mV s}^{-1}$ ,  $20 \text{ mV s}^{-1}$ ,  $30 \text{ mV s}^{-1}$ ,  $40 \text{ mV s}^{-1}$ , and  $50 \text{ mV s}^{-1}$  in a  $\text{CO}_2$ -bubbled  $0.1 \text{ M KHCO}_3$  electrolyte (H-type cell with CEM) for (a)  $\text{InCu}_5\text{O}_x$ , (b)  $\text{InCu}_{10}\text{O}_x$ , (c)  $\text{InCu}_{25}\text{O}_x$ , and (d)  $\text{InCu}_{73}\text{O}_x$  materials. The potential window of the CV curve was selected between  $0.31 \text{ V}$  and  $0.41 \text{ V vs. RHE}$  (double-layer charging and discharging interval).



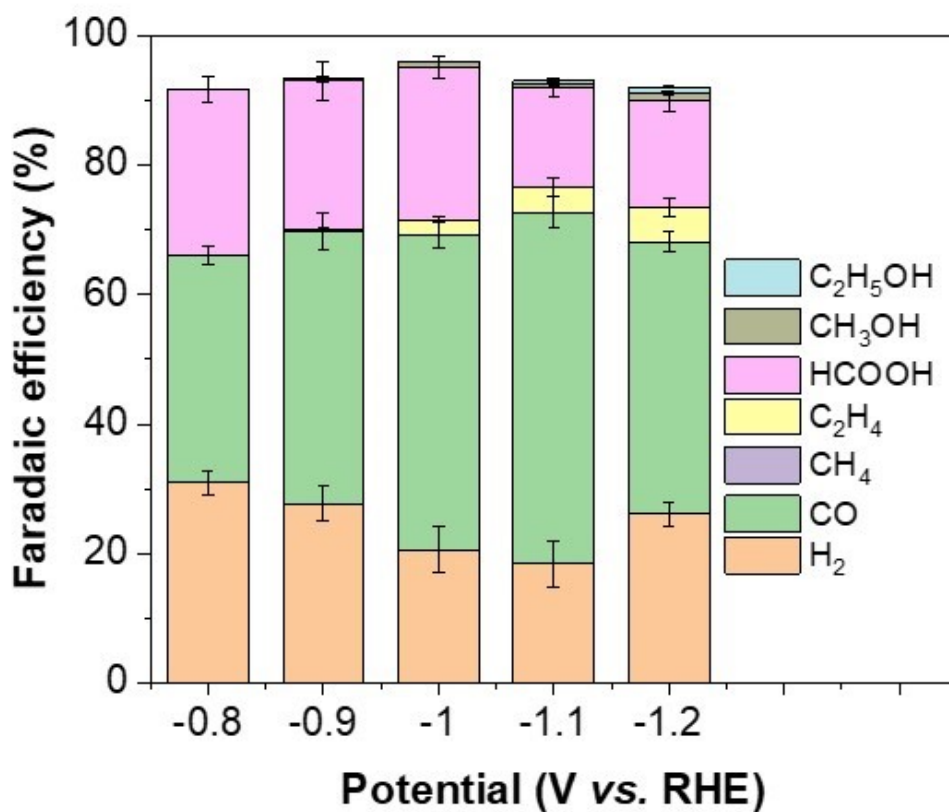

**Fig. S12.** The FE for different eCO<sub>2</sub>R products at selected potentials over InCu<sub>73</sub>O<sub>x</sub> material in a flow cell with CEM (0.1 M KHCO<sub>3</sub>). See Fig. 7c for the comparable data over InCu<sub>73</sub>O<sub>x</sub> material (in 1 M KOH using flow cell with AEM).

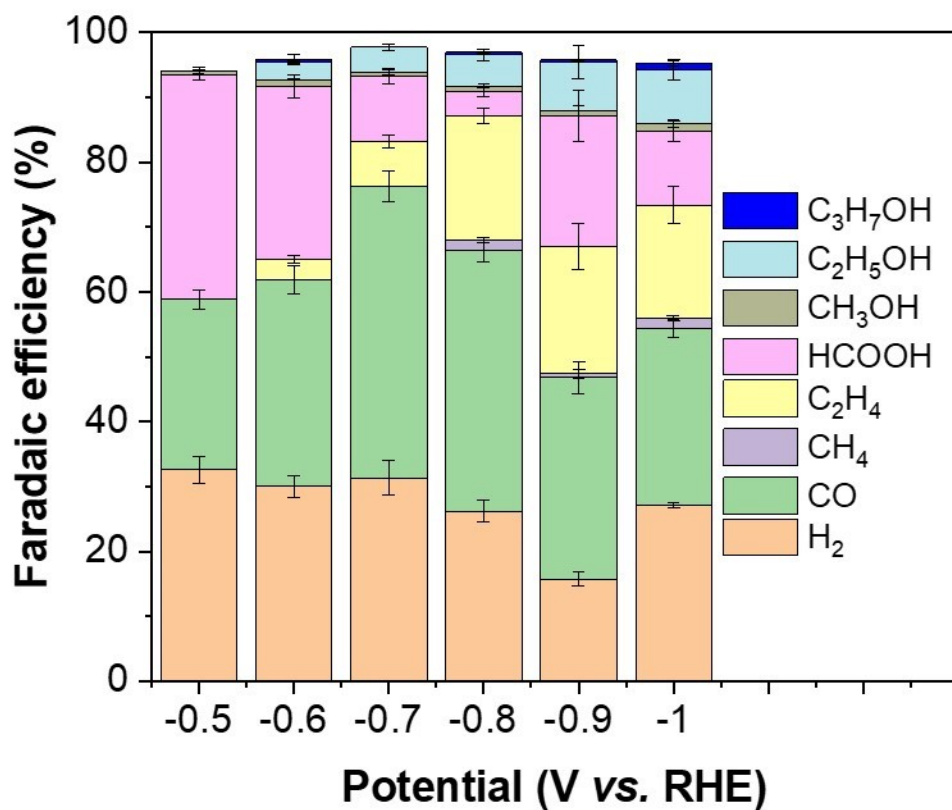

**Fig. S13.** FE for different products at selected potentials in CO<sub>2</sub>-saturated 1 M KOH using a flow cell with CEM: InCu<sub>73</sub>O<sub>x</sub>. Six primary eCO<sub>2</sub>R products were obtained (i.e., CO, CH<sub>4</sub>, HCOOH, CH<sub>3</sub>OH, C<sub>2</sub>H<sub>4</sub>, C<sub>2</sub>H<sub>5</sub>OH, and C<sub>3</sub>H<sub>7</sub>OH) along with HER-liberated H<sub>2</sub>. See Fig. 7c for the comparable data over InCu<sub>73</sub>O<sub>x</sub> material (with AEM).

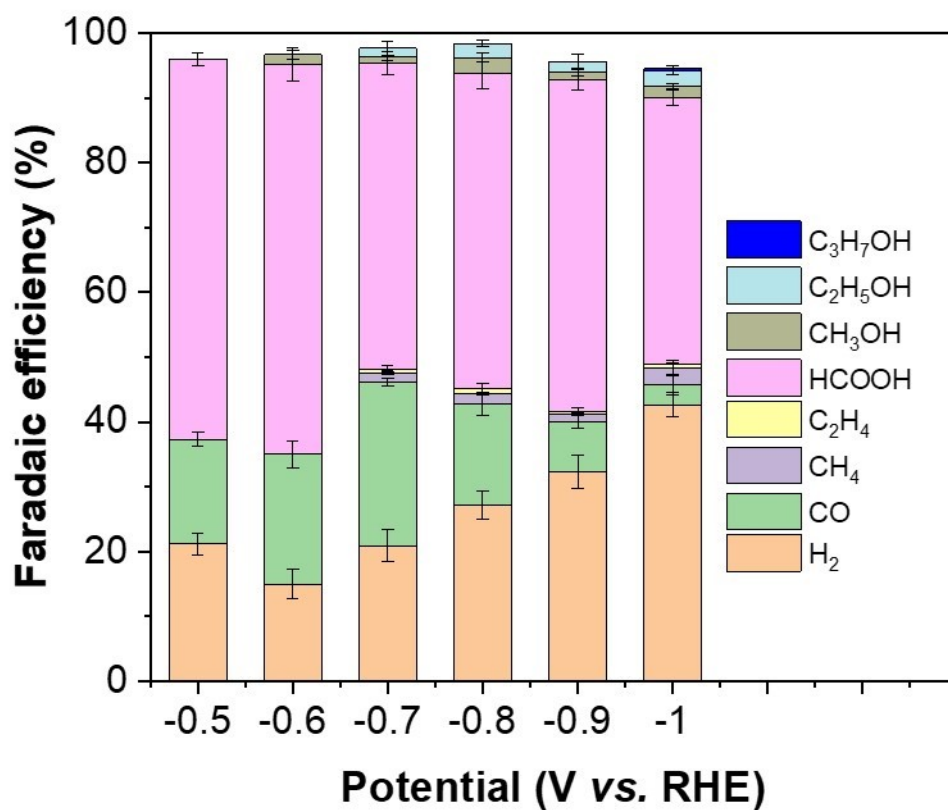

**Fig. S14.** FE for different products at selected potentials in CO<sub>2</sub>-saturated 1 M KOH using a flow cell with AEM: InCu<sub>5</sub>O<sub>x</sub>. Six primary eCO<sub>2</sub>R products were obtained (i.e., CO, CH<sub>4</sub>, HCOOH, CH<sub>3</sub>OH, C<sub>2</sub>H<sub>4</sub>, C<sub>2</sub>H<sub>5</sub>OH, and C<sub>3</sub>H<sub>7</sub>OH) along with HER-liberated H<sub>2</sub>. See Fig. 7c for the comparable data over InCu<sub>73</sub>O<sub>x</sub> material.

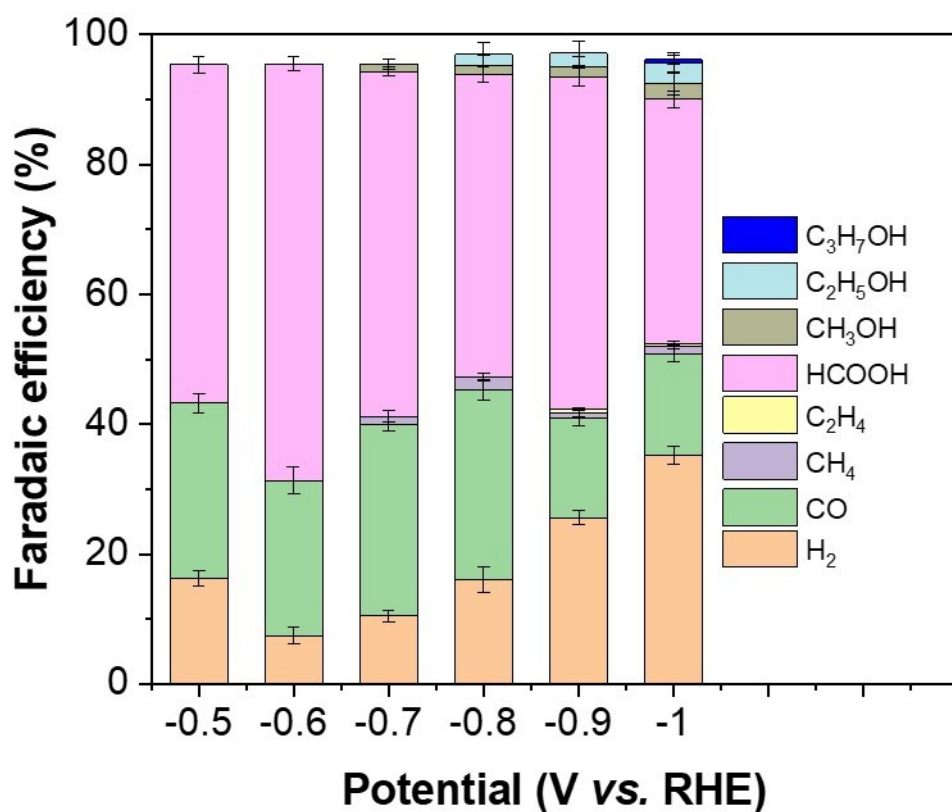

**Fig. S15.** FE for different products at selected potentials in CO<sub>2</sub>-saturated 1 M KOH using a flow cell with AEM: InCu<sub>10</sub>O<sub>x</sub>. Six primary eCO<sub>2</sub>R products were obtained (i.e., CO, CH<sub>4</sub>, HCOOH, CH<sub>3</sub>OH, C<sub>2</sub>H<sub>4</sub>, C<sub>2</sub>H<sub>5</sub>OH, and C<sub>3</sub>H<sub>7</sub>OH) along with HER-liberated H<sub>2</sub>. See Fig. 7c for the comparable data over InCu<sub>73</sub>O<sub>x</sub> material.

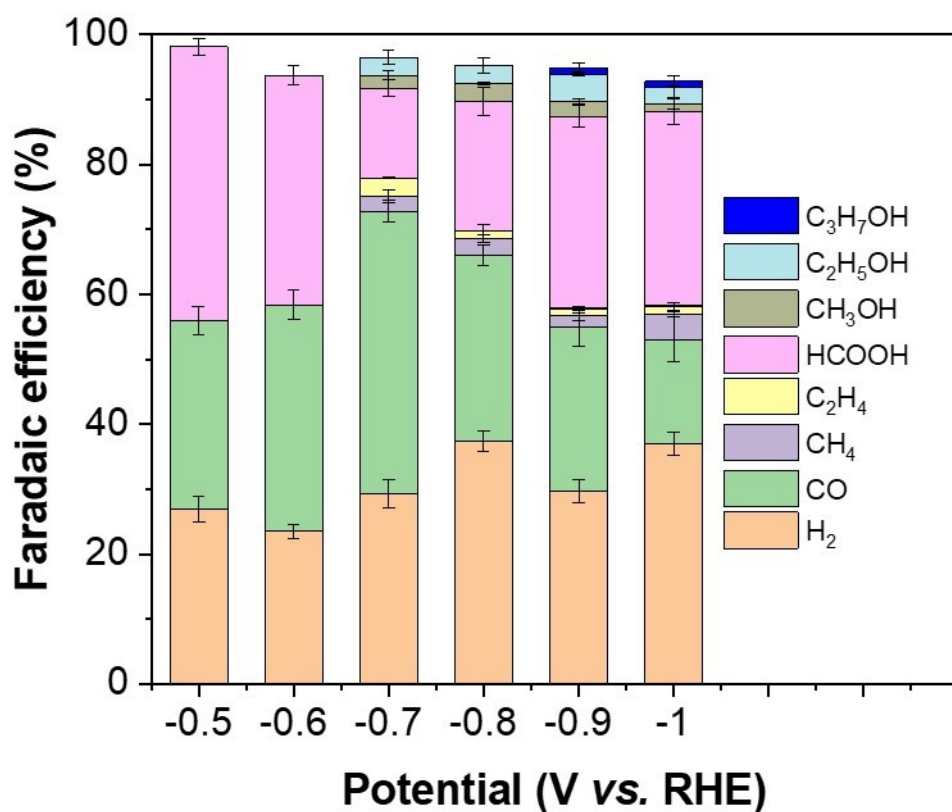

**Fig. S16.** FE for different products at selected potentials in CO<sub>2</sub>-saturated 1 M KOH using a flow cell with AEM: InCu<sub>25</sub>O<sub>x</sub>. Six primary eCO<sub>2</sub>R products were obtained (i.e., CO, CH<sub>4</sub>, HCOOH, CH<sub>3</sub>OH, C<sub>2</sub>H<sub>4</sub>, C<sub>2</sub>H<sub>5</sub>OH, and C<sub>3</sub>H<sub>7</sub>OH) along with HER-liberated H<sub>2</sub>. See Fig. 7c for the comparable data over InCu<sub>73</sub>O<sub>x</sub> material.

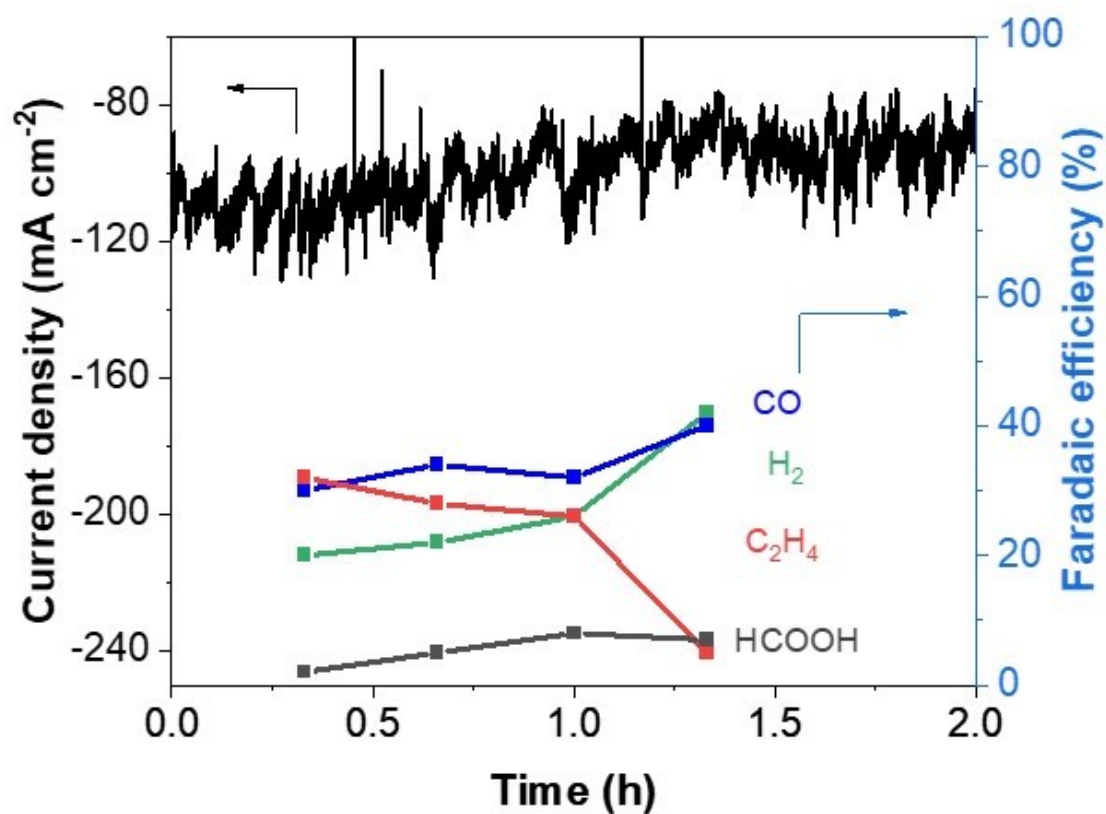

**Fig. S17.** Evaluation of eCO<sub>2</sub>R electrocatalytic performance in the flow cell system with AEM (1 M KOH): Stability testing of InCu<sub>73</sub>O<sub>x</sub> catalyst for 2 h. Left y-axis: current density of the InCu<sub>73</sub>O<sub>x</sub> at -0.8 V vs. RHE. Right y-axis: the FE<sub>H<sub>2</sub></sub>, FE<sub>CO</sub>, FE<sub>HCOOH</sub>, and FE<sub>C<sub>2</sub>H<sub>4</sub></sub>.

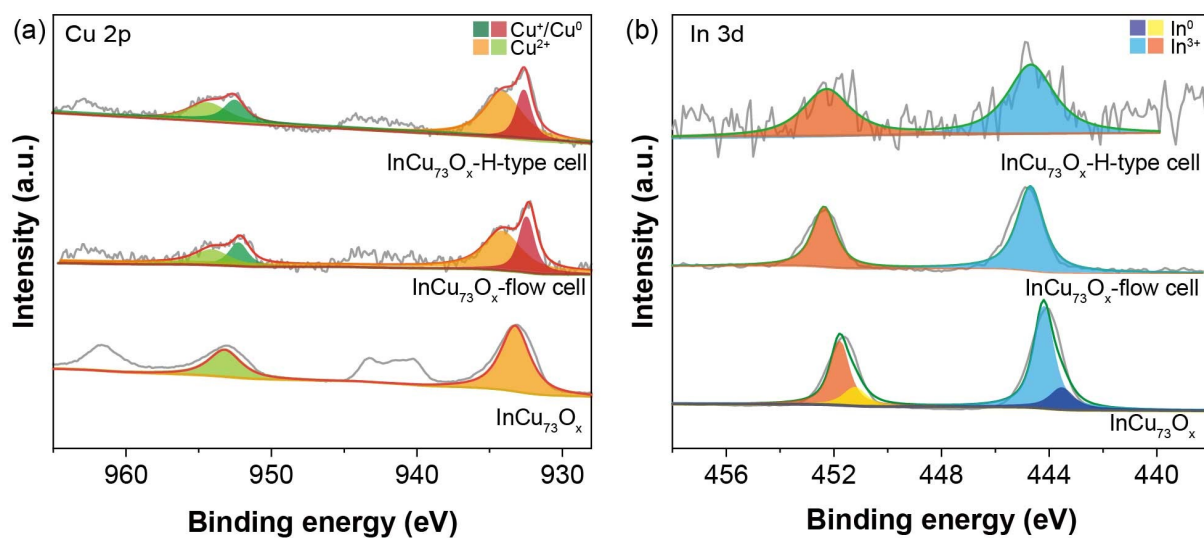

**Fig. S18.** Summary of XPS characterization: (a) Cu 2p spectra of InCu<sub>73</sub>O<sub>x</sub> before and after eCO<sub>2</sub>R in a flow cell with AEM (−0.8 V vs. RHE for 1 h) and H-type cell with CEM (−1.2 V vs. RHE for 1 h). (b) In 3d spectra of InCu<sub>73</sub>O<sub>x</sub> before and after eCO<sub>2</sub>R in a flow cell with AEM (−0.8 V vs. RHE for 1 h) and H-type cell with CEM (−1.2 V vs. RHE for 1 h).

**Table S1.** The atom percentage of different elements in as-synthesized catalysts

| Sample                            | Cu loading<br>(wt%) <sup>a</sup> | In loading<br>(wt%) <sup>a</sup> |
|-----------------------------------|----------------------------------|----------------------------------|
| InCu <sub>5</sub> O <sub>x</sub>  | 5.27                             | 74.06                            |
| InCu <sub>10</sub> O <sub>x</sub> | 10.05                            | 71.24                            |
| InCu <sub>25</sub> O <sub>x</sub> | 25.18                            | 51.61                            |
| InCu <sub>73</sub> O <sub>x</sub> | 73.48                            | 5.34                             |

<sup>a</sup> Estimated by ICP-OES. Since this work focuses on Cu-part of the catalyst, its ICP loading was reflected in their corresponding names.



**Table S2.** Main textural parameters of InCu<sub>5</sub>O<sub>x</sub>, InCu<sub>10</sub>O<sub>x</sub>, InCu<sub>25</sub>O<sub>x</sub> and InCu<sub>73</sub>O<sub>x</sub>.

| catalyst                          | XPS (at%)                     |                              |                 |                 |                | EDS (at%) |       |       | crystallite<br>Size (nm)  |
|-----------------------------------|-------------------------------|------------------------------|-----------------|-----------------|----------------|-----------|-------|-------|---------------------------|
|                                   | Cu <sup>2+</sup> <sup>a</sup> | Cu <sup>+</sup> <sup>a</sup> | Cu <sup>b</sup> | In <sup>b</sup> | O <sup>b</sup> | Cu        | In    | O     | (-111)<br>Facet of<br>CuO |
| InCu <sub>5</sub> O <sub>x</sub>  | 69.15                         | 30.85                        | 5.46            | 32.12           | 62.41          | 2.67      | 23.33 | 73.99 | 26.12                     |
| InCu <sub>10</sub> O <sub>x</sub> | 77.40                         | 22.60                        | 7.02            | 31.09           | 61.89          | 6.89      | 30.15 | 62.97 | 20.17                     |
| InCu <sub>25</sub> O <sub>x</sub> | 82.31                         | 17.69                        | 12.64           | 25.00           | 62.36          | 8.27      | 30.44 | 61.29 | 21.73                     |
| InCu <sub>73</sub> O <sub>x</sub> | 100                           | 0                            | 41.88           | 6.96            | 51.16          | 30.70     | 2.93  | 66.37 | 21.16                     |

<sup>a</sup> Calculated by the XPS quantitative analysis using the narrow spectra (Cu 2p).

<sup>b</sup> Calculated by the XPS survey scans.

**Table S3.** Catalytic performance of reported bimetallic CuIn-based catalysts in literature.

| Samples                                           | E (V) vs. RHE | Cell-type   | electrolyte             | Main product                                                                                                       | FE of main product (%) | Ref.      |
|---------------------------------------------------|---------------|-------------|-------------------------|--------------------------------------------------------------------------------------------------------------------|------------------------|-----------|
| CuIn alloy nanowires                              | -1            | H-type cell | 0.1 M KHCO <sub>3</sub> | CO                                                                                                                 | 86                     | 2         |
| Cu-In electrode                                   | -0.6          | H-type cell | 0.1 M KHCO <sub>3</sub> | CO                                                                                                                 | 40                     | 3         |
| Cu-In <sub>2</sub> O <sub>3</sub> /C              | -0.7          | H-type cell | 0.1 M KHCO <sub>3</sub> | CO                                                                                                                 | 95                     | 4         |
| CuIn-30                                           |               | H-type cell | 0.1 M KHCO <sub>3</sub> | formate                                                                                                            | 87.4                   | 5         |
| Cu-In hybrid                                      | -0.59         | H-type cell | 0.1 M KHCO <sub>3</sub> | CO                                                                                                                 | 75.8                   | 6         |
| In <sub>1.5</sub> Cu <sub>0.5</sub> nanoparticles | -1.2          | H-type cell | 0.1 M KHCO <sub>3</sub> | CO                                                                                                                 | 90                     | 7         |
| dendritic copper-indium                           | -1            | H-type cell | 0.1 M KHCO <sub>3</sub> | formate                                                                                                            | 80                     | 8         |
| InCu <sub>n</sub> O <sub>x</sub>                  | -0.8          | H-type cell | 0.1 M KHCO <sub>3</sub> | CO                                                                                                                 | 51                     | This work |
| InCu <sub>n</sub> O <sub>x</sub>                  | -0.8          | Flow cell   | 1 M KOH                 | C <sub>2+</sub> (C <sub>2</sub> H <sub>4</sub> +C <sub>2</sub> H <sub>5</sub> OH+C <sub>3</sub> H <sub>7</sub> OH) | 37                     | This work |

## References

- 1 S. U. Din, M. Sajid, M. Imran, J. Iqbal, B. A. Shah, M. Azeem Ullah and S. Shah, *Mater. Res. Express*, 2019, **6**, 085022.
- 2 Q. Zhou, X. Tang, S. Qiu, L. Wang, L. Hao and Y. Yu, *Mater. Today Phys.*, 2023, **33**, 101050.
- 3 S. Rasul, D. H. Anjum, A. Jedidi, Y. Minenkov, L. Cavallo and K. Takanahe, *Angew. Chemie*, 2015, **127**, 2174–2178.
- 4 Y. Jia, H. S. Hsu, W. C. Huang, D. W. Lee, S. W. Lee, T. Y. Chen, L. Zhou, J. H. Wang, K. W. Wang and S. Dai, *Nano Lett.*, 2023, **23**, 2262–2268.
- 5 J. Shao, Y. Wang, D. Gao, K. Ye, Q. Wang and G. Wang, *Chinese J. Catal.*, 2020, **41**, 1393–1400.
- 6 Q. Xie, G. O. Larrazábal, M. Ma, I. Chorkendorff, B. Seger and J. Luo, *J. Energy Chem.*, 2021, **63**, 278–284.
- 7 B. Wei, Y. Xiong, Z. Zhang, J. Hao, L. Li and W. Shi, *Appl. Catal. B Environ.*, 2021, **283**, 119646.
- 8 Z. B. Hoffman, T. S. Gray, K. B. Moraveck, T. B. Gunnoe and G. Zangari, *ACS Catal.*, 2017, **7**, 5381–5390.
